# Supplementary material for: Identifying protein function and functional links based on large-scale co-occurrence patterns
Source: PLOS journal article supplement (doi:10.1371/journal.pone.0264765), 2022-03-03
Supplement: S3 (10.1371/journal.pone.0264765.s003) [file journal.pone.0264765.s003]

**Table S2. True positives and false positives in Cliquery's cliques for CheA compared to KEGG's bacterial chemotaxis pathway (pathway 02030).** *Probability ( $P_{co}$ )* is Cliquery's probability cutoff; Number of proteins is the clique size; the columns *Che*, *MCP*, *Fli* and *Mot* give the number of proteins from each of these groups appearing in the identified clique; *True positive* is the percentage of proteins in Cliquery's clique that are part of the KEGG pathway. *False positive* is the percentage of proteins in Cliquery's clique that do not appear in the KEGG pathway. The pathway can be viewed at <https://www.genome.jp/pathway/map02030+K03407>.

| Probability ( $P_{co}$ ) | Number of proteins in the clique | Che | MCP | Fli | Mot | True positive | False positive |
|--------------------------|----------------------------------|-----|-----|-----|-----|---------------|----------------|
| 0.85                     | 3                                | 1   | 2   | 0   | 0   | 100%          | 0%             |
|                          |                                  |     |     |     |     |               |                |
| 0.8                      | 12                               | 1   | 0   | 6   | 1   | 67%           | 33%            |
|                          | 6                                | 4   | 2   | 0   | 0   | 100%          | 0%             |
|                          |                                  |     |     |     |     |               |                |
| 0.75                     | 17                               | 2   | 0   | 7   | 2   | 65%           | 35%            |
|                          | 22                               | 1   | 0   | 11  | 2   | 64%           | 36%            |
|                          | 18                               | 3   | 1   | 7   | 2   | 72%           | 28%            |
|                          | 18                               | 4   | 2   | 7   | 1   | 78%           | 22%            |
|                          | 5                                | 4   | 1   | 0   | 0   | 100%          | 0%             |
|                          |                                  |     |     |     |     |               |                |
| 0.7                      | 27                               | 4   | 2   | 11  | 2   | 70%           | 30%            |
|                          | 21                               | 3   | 3   | 7   | 2   | 71%           | 29%            |
|                          | 8                                | 5   | 2   | 0   | 0   | 88%           | 13%            |
|                          | 8                                | 4   | 3   | 0   | 0   | 88%           | 13%            |
|                          | 26                               | 3   | 2   | 11  | 2   | 69%           | 31%            |
|                          |                                  |     |     |     |     |               |                |
| 0.65                     | 30                               | 4   | 2   | 11  | 2   | 63%           | 37%            |
|                          | 30                               | 4   | 3   | 12  | 2   | 70%           | 30%            |
|                          | 30                               | 5   | 3   | 12  | 2   | 73%           | 27%            |
|                          | 29                               | 3   | 4   | 12  | 2   | 72%           | 28%            |
|                          | 28                               | 2   | 2   | 11  | 2   | 61%           | 39%            |
|                          |                                  |     |     |     |     |               |                |
| 0.6                      | 32                               | 1   | 2   | 10  | 3   | 50%           | 50%            |
|                          | 30                               | 1   | 2   | 8   | 3   | 47%           | 53%            |
|                          | 29                               | 1   | 2   | 6   | 3   | 41%           | 59%            |
|                          | 29                               | 1   | 2   | 6   | 3   | 41%           | 59%            |
|                          | 28                               | 1   | 2   | 5   | 3   | 39%           | 61%            |

**Table S2. True positives and false positives in Cliquery's cliques for CheA compared to KEGG's bacterial chemotaxis pathway (pathway 02030).**

The table demonstrate that as *Pco* decreases, Cliquely identifies more cliques, and the number of proteins per cliques increases (in this example, an average of 3, 9, 16, 18, 29, 30 proteins per clique were identified for *Pco* values of 0.85, 0.8, 0.75, 0.65, 0.6, respectively). True positive percentage decreases with *Pco* (an average of 100%, 83%, 76%, 77%, 68%, 44% for *Pco* values of 0.85, 0.8, 0.75, 0.65, 0.6, respectively), and false positive percentage increases (an average of 0%, 17%, 24%, 32%, 56% on average for *Pco* values of 0.85, 0.8, 0.75, 0.65, 0.6, respectively). A false positive here does necessarily imply an erroneous identification, but rather that the protein identified by Cliquely as connected to CheA does not appear in the small KEGG pathway 02030.
